# Supplementary material for: Facile preparation, mechanochromic luminescence and excitation wavelength-dependent emission of tetra(1 H -benzo[ d ]imidazol-2-yl)ethene Zn( ii ) complexes and their applications
Source: Royal Society of Chemistry journal article supplement (doi:10.1039/d4dt03434a), 2025-01-01
Supplement: d4dt03434a1.pdf [file d4dt03434a1.pdf]

## Electronic Supporting Information (ESI)

# **Facile Preparation, Mechanochromic Luminescence and Excitation Wavelength-Dependent Emission of Tetra(1H-benzo[d]imidazol-2-yl)ethene Zn (II) Complexes and Their Applications**

*Su-Jia Liu,<sup>1a</sup> Yong-Sheng Shi,<sup>1a,b</sup> Rui-Ying Wang,<sup>a</sup> Tong Xiao,<sup>a</sup> Zhong-Gang Xia,<sup>a</sup> Rui Wang<sup>a</sup> and Xiang-Jun Zheng<sup>\*a</sup>*

<sup>a</sup> Beijing Key Laboratory of Energy Conversion and Storage Materials, College of Chemistry, Beijing Normal University, Beijing 100875, P. R. China.

<sup>b</sup> College of Chemistry and Chemical Engineering, Jiangxi Science and Technology Normal University, Nanchang 330013, PR China.

<sup>1</sup> These authors contributed equally to this work.

\*Corresponding author.

Email: xjzheng@bnu.edu.cn

## CONTENTS

### 1. Experimental information

1.1 Materials and physical measurements

### 2. Supplementary Tables and Structural Figures

2.1 Figure S1-S10

2.2 Table S1-S3

### Section 1. Experimental Section

#### 1.1 Materials and physical measurements

All chemicals and reagents in this work were purchased from commercial sources and used without further purification. C, H, and N elemental analyses were collected with a Vario EL elemental analyzer. The fluorescence spectra were recorded on an FLS980 fluorescence spectrophotometer. Fourier transform infrared (FTIR) spectra were measured in the range of 500–4000  $\text{cm}^{-1}$  using an Avatar 360 FT-IR spectrometer with KBr pellets. The X-ray powder diffraction (PXRD) patterns were performed on SHIMADZU XRD-7000 diffractometer Cu-K $\alpha$  radiation ( $\lambda = 1.5418 \text{ \AA}$ ) and  $2\theta$  ranging from  $5^\circ$  to  $50^\circ$  at room temperature. Solid-state UV–Vis absorption spectra were recorded on a TU-1901 spectrophotometer in the range of 250–800 nm. Thermogravimetric data (TGA) were performed using a NETASCH STA449 F5 at a heating rate of  $10 \text{ }^\circ\text{C} \cdot \text{min}^{-1}$  in the range of 25–500  $^\circ\text{C}$  under nitrogen flow. Single crystals X-ray diffraction data were collected on the XtaLAB Synergy-DW diffractometer with Cu-K $\alpha$  radiation ( $\lambda = 1.54184 \text{ \AA}$ , powered at 4 kW) and Mo K $\alpha$  radiation ( $\lambda = 0.71073 \text{ \AA}$ , powered at 4 kW).

## Section 2. Supplementary Tables, Structural Figures and Scheme

### 2.1 Figure S1-S10

**Figure S1**  $^1\text{H}$  NMR spectra of  $\text{L}^1$

**Figure S2** IR spectra of complex **1**(a) and complex **2** (b)

**Figure S3** (a) Molecular structure of complex **2** (b) The stacking form of complex **2**

**Figure S4** TGA curves of complex **1** (a) and complex **2** (b)

**Figure S5** Luminescence decay curves and fit results of complex **1** at 463 nm (a) and 640 nm (b)

**Figure S6** (a) The peak-splitting result of complex **2** luminescence emission (b) Luminescence decay curves and fit results of complex **2** at 570 nm

**Figure S7** Luminescence emission spectra of complex **1** (a) and complex **2** (b) upon repeating the grinding-fuming processes

**Figure S8** UV-Vis spectra of complex **1** (a) and complex **2** (b) upon repeating the grinding-fuming processes

**Figure S9** The CIE chromaticity diagram reveals the dynamic luminescence color change of complex **1** (a) and complex **2** (b) in crystal state excited by different wavelengths of light

**Figure S10** UV-Vis absorption spectra of complexes **1** and **2** in PMMA films

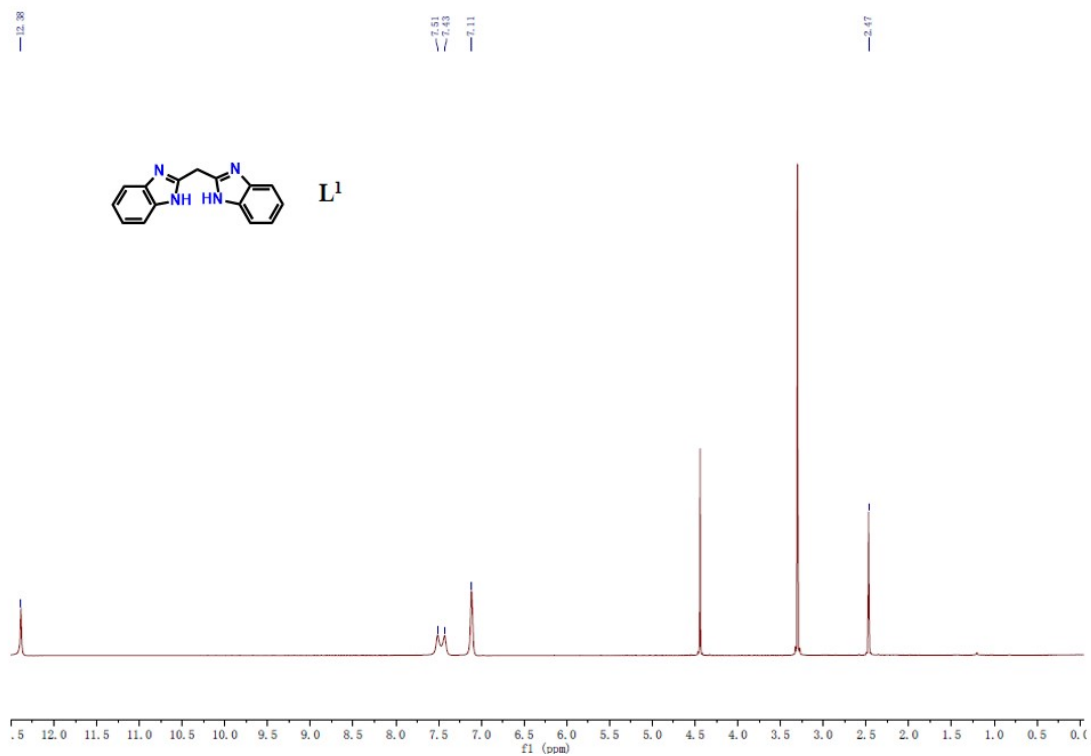

Figure S1  $^1\text{H}$  NMR spectra of  $\text{L}^1$

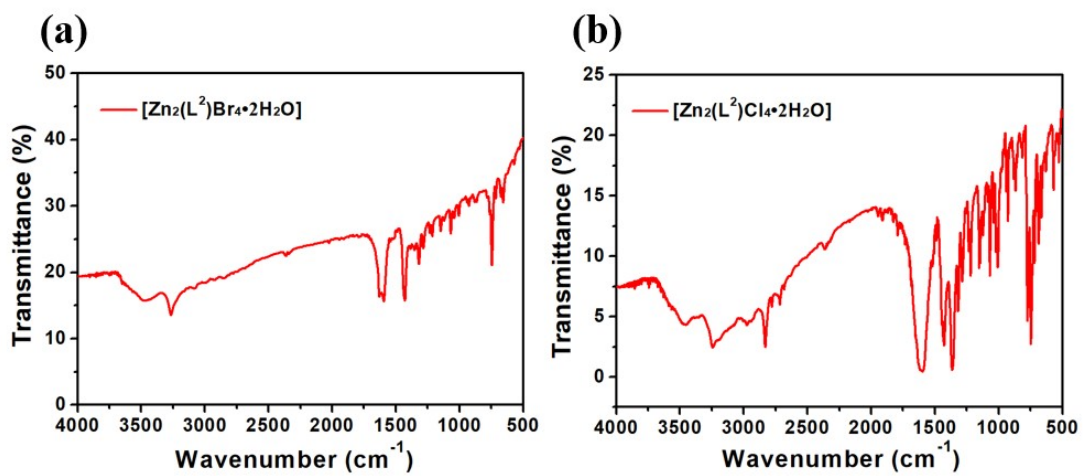

Figure S2 IR spectra of complex 1(a) and complex 2 (b)

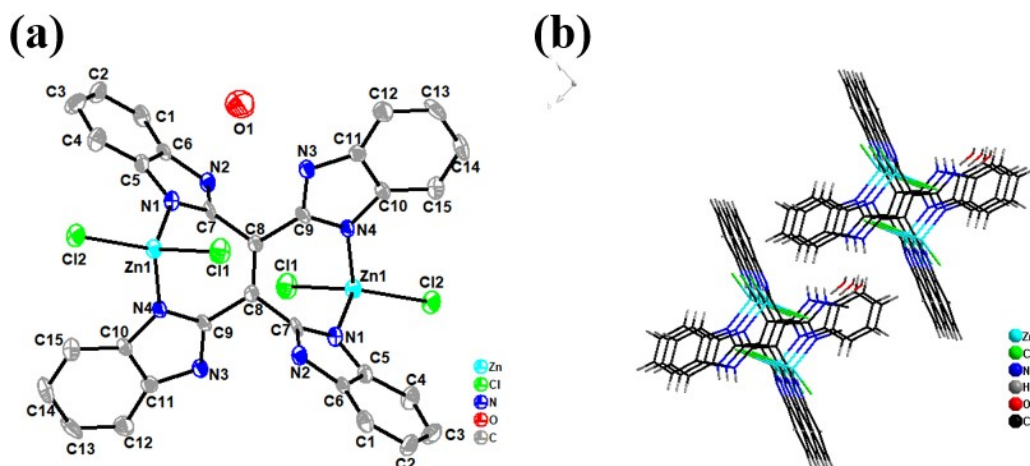

**Figure S3** (a) Molecular structure of complex 2 (b) The stacking form of complex 2.

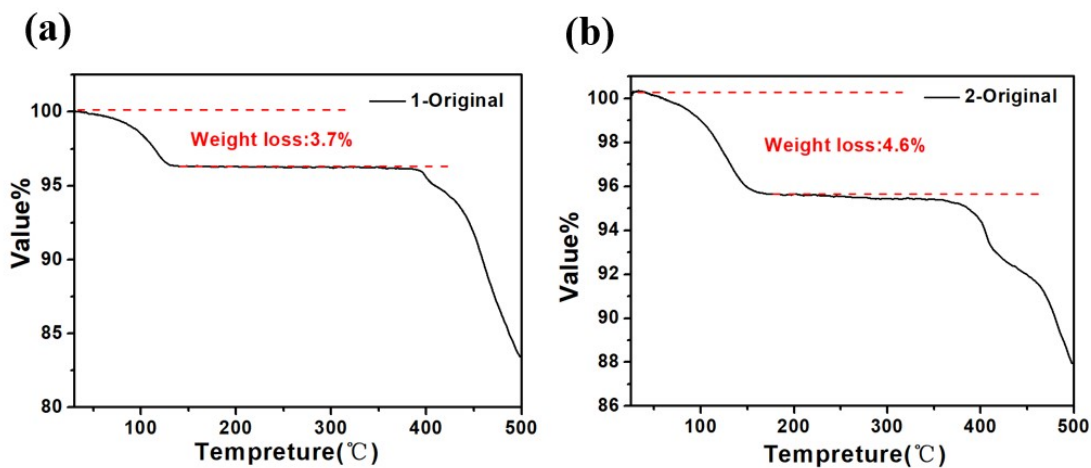

**Figure S4** TGA curves of complex 1 (a) and complex 2 (b)

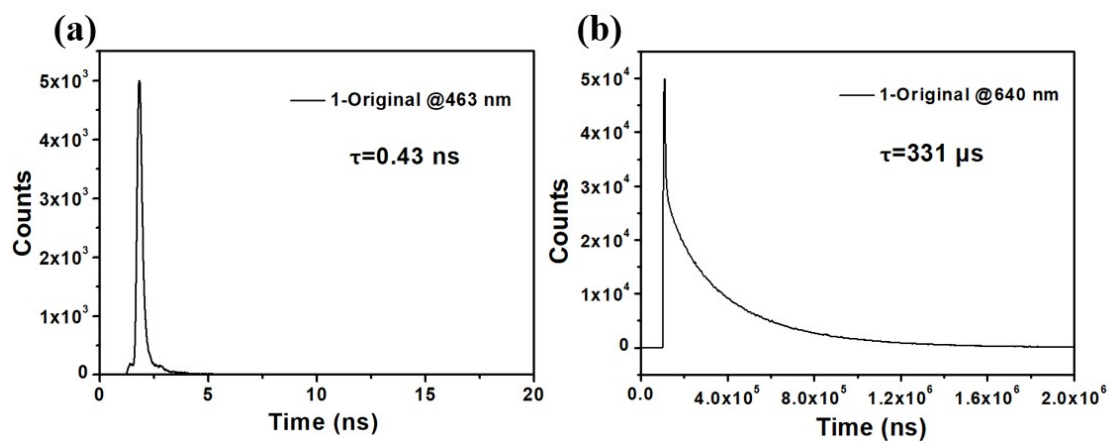

**Figure S5** (a) Luminescence decay curves and fit results of complex 1 at 463 nm (b) Luminescence decay curves and fit results of complex 1 at 640 nm

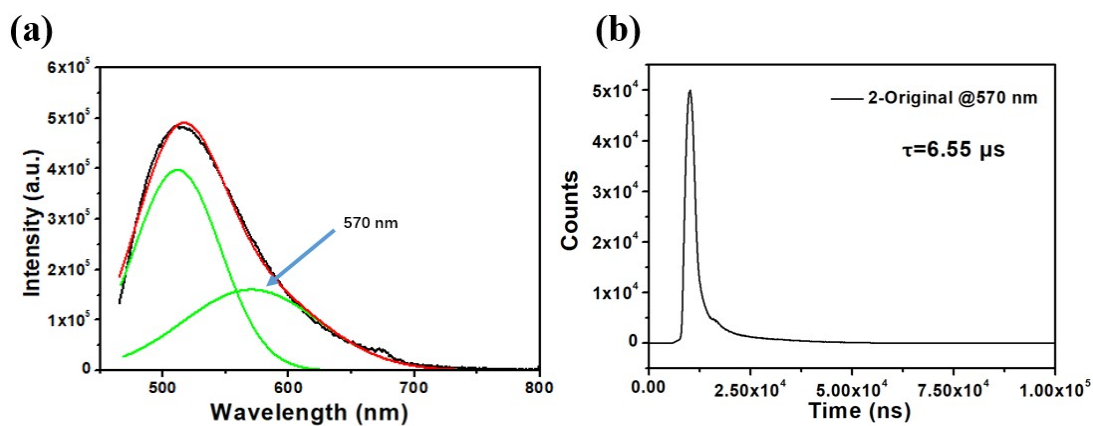

**Figure S6** (a) The peak-splitting result of complex 2 luminescence emission (b) Luminescence decay curves and fit results of complex 2 at 570 nm

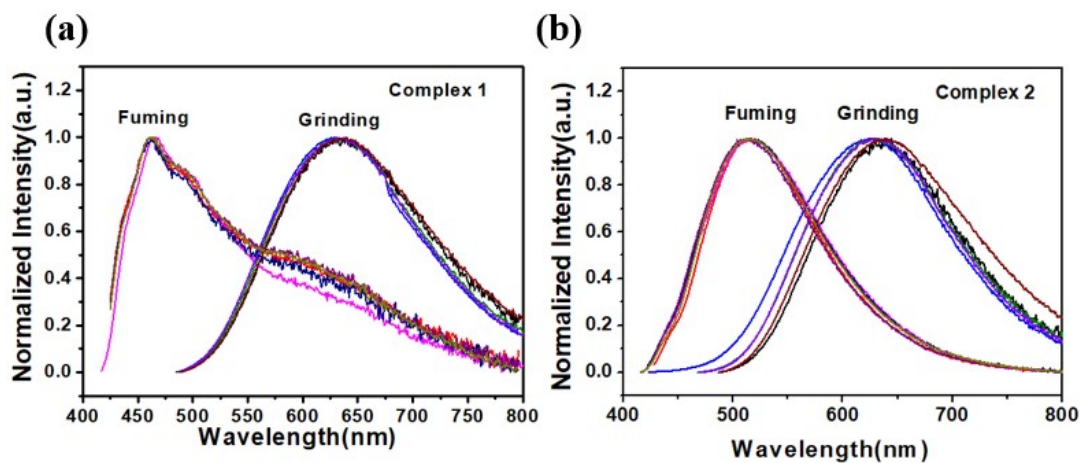

**Figure S7** Luminescence emission spectra of complex 1 (a) and complex 2 (b) upon repeating the grinding-fuming processes

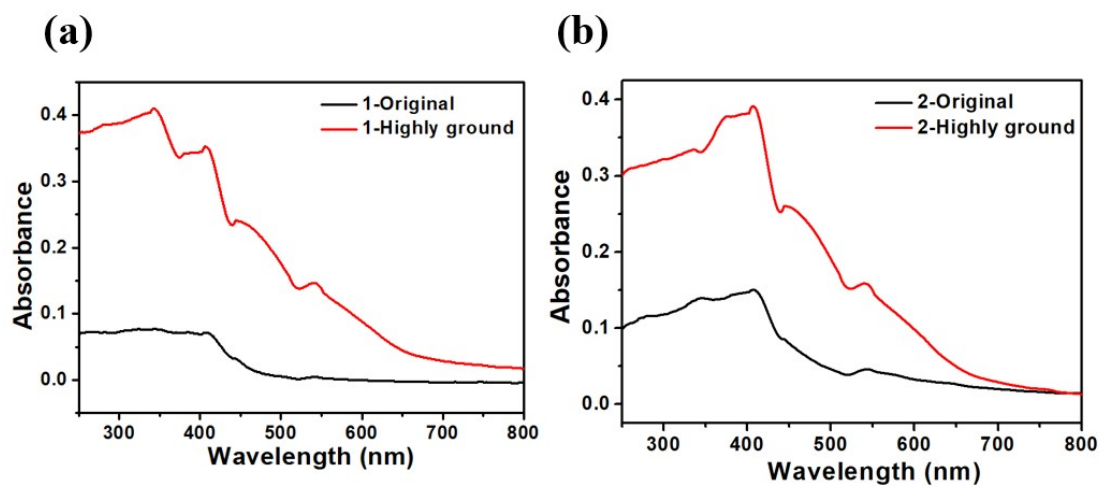

**Figure S8** UV-Vis spectra of complex 1 (a) and complex 2 (b) upon repeating the grinding-fuming processes

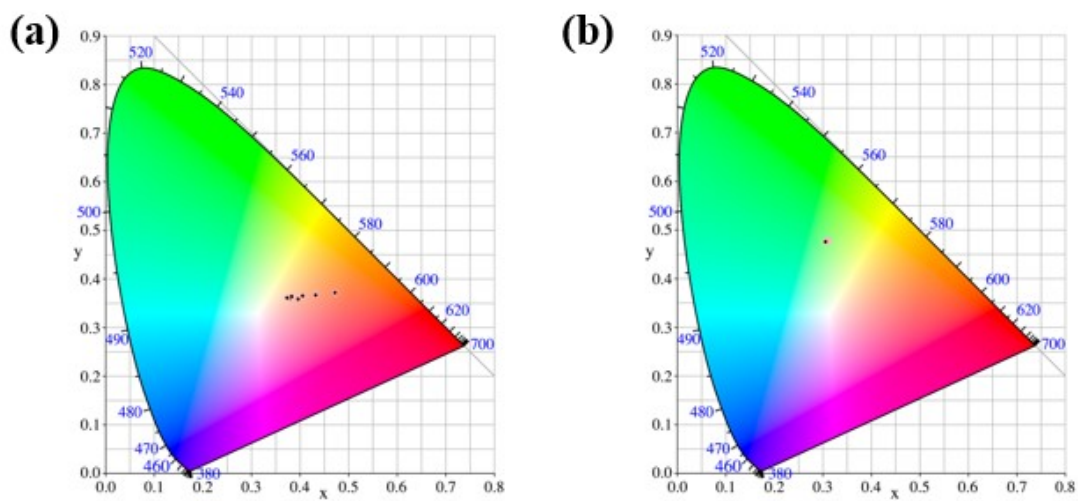

**Figure S9** (a) The CIE chromaticity diagram reveals the dynamic luminescence color change of complex **1** in crystal state excited by different wavelengths of light (b) The CIE chromaticity diagram reveals the dynamic luminescence color change of complex **2** in crystal state excited by different wavelengths of light

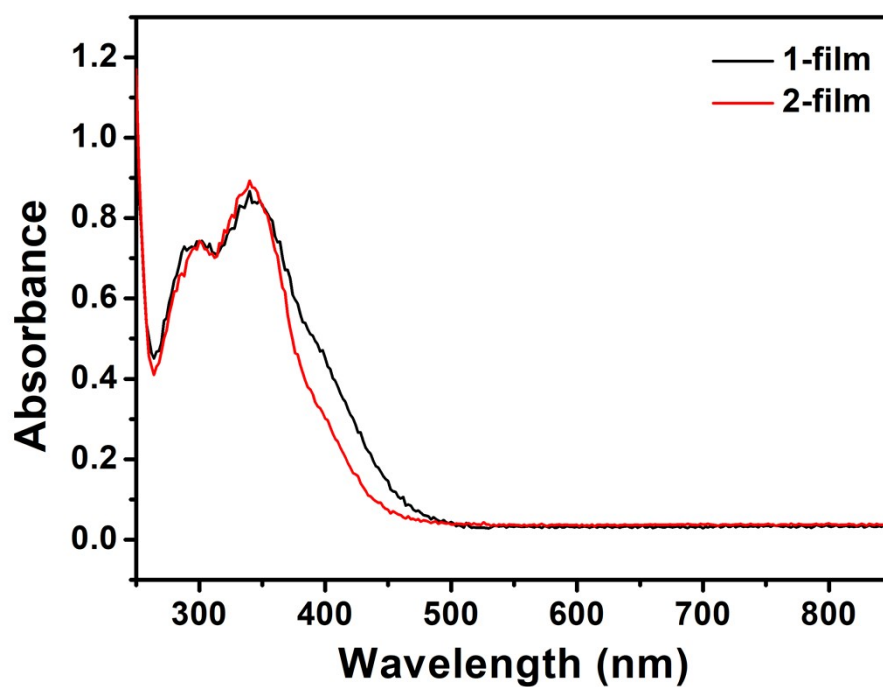

**Figure S10** UV-Vis absorption spectra of complexes **1** and **2** in PMMA films.

## **Section 2. Supplementary Tables, Structural Figures and Scheme**

### **2.2 Table S1-S3**

**Table S1** Crystal data and structure refinement parameters of complexes **1** and **2**

**Table S2** Selected bond distances (Å) and angles (°) for complexes **1** and **2**

**Table S3** Types of intramolecular and intermolecular interactions, corresponding bond distances and angles in complexes **1** and **2**.



**Table S1** Crystal data and structure refinement parameters of complexes **1** and **2**

| Empirical formula                           | C <sub>15</sub> H <sub>12</sub> N <sub>4</sub> OZnBr <sub>2</sub> ( <b>1</b> ) | C <sub>15</sub> H <sub>12</sub> N <sub>4</sub> OZnCl <sub>2</sub> ( <b>2</b> ) |
|---------------------------------------------|--------------------------------------------------------------------------------|--------------------------------------------------------------------------------|
| Formula weight                              | 489.48                                                                         | 400.56                                                                         |
| Temperature/K                               | 293(2)                                                                         | 99.99(10)                                                                      |
| Crystal system                              | triclinic                                                                      | triclinic                                                                      |
| Space group                                 | <i>P</i> $\bar{1}$                                                             | <i>P</i> $\bar{1}$                                                             |
| a/Å                                         | 9.1124(5)                                                                      | 8.8194(5)                                                                      |
| b/Å                                         | 9.9522(4)                                                                      | 9.7128(7)                                                                      |
| c/Å                                         | 9.9964(6)                                                                      | 9.8023(5)                                                                      |
| $\alpha$ /°                                 | 88.322(4)                                                                      | 91.156(5)                                                                      |
| $\beta$ /°                                  | 70.428(5)                                                                      | 95.778(4)                                                                      |
| $\gamma$ /°                                 | 83.041(4)                                                                      | 107.223(6)                                                                     |
| Volume/Å <sup>3</sup>                       | 847.82(8)                                                                      | 796.85(9)                                                                      |
| Z                                           | 2                                                                              | 2                                                                              |
| $\rho_{\text{calc}}$ /cm <sup>3</sup>       | 1.917                                                                          | 1.669                                                                          |
| $\mu$ /mm <sup>-1</sup>                     | 6.169                                                                          | 1.884                                                                          |
| F(000)                                      | 476.0                                                                          | 404.0                                                                          |
| Radiation                                   | Mo K $\alpha$ ( $\lambda$ = 0.71073)                                           | Mo K $\alpha$ ( $\lambda$ = 0.71073)                                           |
| 2 $\theta$ range for data collection/°      | 7 to 57.482                                                                    | 6.716 to 59.822                                                                |
| Index ranges                                | -11 $\leq$ h $\leq$ 11, -13 $\leq$ k $\leq$ 12,<br>-13 $\leq$ l $\leq$ 12      | -11 $\leq$ h $\leq$ 11, -7 $\leq$ k $\leq$ 13,<br>-12 $\leq$ l $\leq$ 13       |
| Reflections collected                       | 6061                                                                           | 6772                                                                           |
| Independent reflections                     | 3547[R <sub>int</sub> = 0.0201, R <sub>sigma</sub> = 0.0408]                   | 3744[R <sub>int</sub> = 0.0612, R <sub>sigma</sub> = 0.0955]                   |
| Data/restraints/parameters                  | 3457/3/211                                                                     | 3744/4/214                                                                     |
| Goodness-of-fit on F <sup>2</sup>           | 1.038                                                                          | 1.025                                                                          |
| Final R indexes [I $\geq$ 2 $\sigma$ (I)]   | R <sub>1</sub> = 0.0340, wR <sub>2</sub> = 0.0672                              | R <sub>1</sub> = 0.0488, wR <sub>2</sub> = 0.0968                              |
| Final R indexes [all data]                  | R <sub>1</sub> = 0.0482, wR <sub>2</sub> = 0.0732                              | R <sub>1</sub> = 0.0639, wR <sub>2</sub> = 0.1110                              |
| Largest diff. peak/hole / e Å <sup>-3</sup> | 0.62/-0.48                                                                     | 1.06/-0.67                                                                     |
| CCDC number                                 | 2373214                                                                        | 2373223                                                                        |

**Table S2** Selected bond distances (Å) and angles (°) for complexes **1** and **2**

|          |     |                 |                 |           |                 |                 |                 |           |
|----------|-----|-----------------|-----------------|-----------|-----------------|-----------------|-----------------|-----------|
| <b>1</b> | Br2 | Zn1             | 2.3340(5)       |           | Zn1             | N1              | 2.039(3)        |           |
|          | Br1 | Zn1             | 2.3611(5)       |           | Zn1             | N4 <sup>1</sup> | 2.049(2)        |           |
|          | C8  | C8 <sup>1</sup> | 1.347(6)        |           | C8              | C7              | 1.470(4)        |           |
|          | C9  | C8              | 1.476(4)        |           |                 |                 |                 |           |
|          | Br2 | Zn1             | Br1             | 116.08(2) | N1              | Zn1             | N4 <sup>1</sup> | 89.42(10) |
|          | N1  | Zn1             | Br2             | 116.25(8) | N4 <sup>1</sup> | Zn1             | Br2             | 113.99(7) |
|          | N1  | Zn1             | Br1             | 108.63(7) | N4 <sup>1</sup> | Zn1             | Br1             | 109.33(8) |
|          | C7  | C8              | C8 <sup>1</sup> | 123.1(3)  | C9              | C8              | C8 <sup>1</sup> | 124.0(4)  |
|          | C7  | C8              | C9              | 112.7(3)  |                 |                 |                 |           |
| <b>2</b> | Cl2 | Zn1             | 2.2136(8)       |           | Zn1             | N1              | 2.029(3)        |           |
|          | Cl1 | Zn1             | 2.2367(9)       |           | Zn1             | N4 <sup>1</sup> | 2.040(3)        |           |
|          | C8  | C8 <sup>1</sup> | 1.353(6)        |           | C8              | C7              | 1.456(4)        |           |
|          | C9  | C8              | 1.497(4)        |           |                 |                 |                 |           |
|          | Cl2 | Zn1             | Cl1             | 118.90(4) | N1              | Zn1             | N4 <sup>1</sup> | 89.82(11) |
|          | N1  | Zn1             | Cl2             | 114.57(8) | N4 <sup>1</sup> | Zn1             | Cl2             | 112.99(7) |
|          | N1  | Zn1             | Cl1             | 107.90(7) | N4 <sup>1</sup> | Zn1             | Cl1             | 108.80(8) |
|          | C7  | C8              | C8 <sup>1</sup> | 124.5(3)  | C9              | C8              | C8 <sup>1</sup> | 122.9(4)  |
|          | C7  | C8              | C9              | 112.5(3)  |                 |                 |                 |           |

<sup>1</sup>1-x, 1-y, 1-z**Table S3** Types of intramolecular and intermolecular interactions, corresponding bond distances and angles in complexes **1** and **2**.

| Compound | Interactions           | Distances (Å) | Angles (°) |
|----------|------------------------|---------------|------------|
| <b>1</b> | N3-H3...Br2            | 2.67          | 143        |
|          | O1-H1...Br1            | 2.53          | 139        |
|          | N2-H2...O1             | 1.94          | 172        |
|          | C13-H13... $\pi$ Cg1   | 2.73          | 158        |
|          | $\pi$ Cg3... $\pi$ Cg3 | 3.945         | 180        |
| <b>2</b> | N3-H3...Cl2            | 2.46          | 145        |
|          | O1-H1... Cl1           | 2.38          | 168        |
|          | N2-H2...O1             | 1.94          | 166        |
|          | C13-H13... $\pi$ Cg1   | 2.61          | 158        |
|          | $\pi$ Cg3... $\pi$ Cg3 | 3.855         | 180        |
